# Supplementary material for: A preliminary study on the comprehensive threshold for debris-flow early warning
Source: Copernicus journal article supplement (doi:10.5194/nhess-2016-149), 2016-05-10
Supplement: Supplementary file [file nhess-2016-149-AC2-supplement.pdf]

1                   **A rainfall and pore pressure thresholds for debris-flow early warning:**  
2                   **The Wenjiagou gully case study**

3  
4                   *Xiaoqiang XUE, Jian HUANG*

5                   *State Key Laboratory of Geohazard Prevention and Geoenvironment Protection*  
6                   *Chengdu University of Technology, Chengdu, Sichuan 610059, China*  
7                   *E-mail: huangjian2010@gmail.com*  
8

9                   **Abstract**

10                   Debris-flows not only cause a great loss of property, but also kill and injure  
11                   people every rainy season in the mountainous regions of China. In order to reduce  
12                   hazard and risk, several methods of assessing rainfall thresholds have been  
13                   provided at present, based on statistical models. However, the limited rainfall data  
14                   with debris-flow occurrence or non-occurrence makes threshold analyses very  
15                   difficult. This paper, therefore, presented a kind of warning threshold consisting of  
16                   pore-water pressure from Terzaghi theory, and rainfall factors from frequent usage  
17                   for predicting debris-flow occurrence. Rainfall and pore pressure data has been  
18                   collected in a number of locations in Wenjiagou gully to assess critical rainfall and  
19                   pore pressure values for debris flow initiation. The three-level early warning  
20                   criteria (Zero, Attention, and Warning) has been adopted and the corresponding  
21                   judgement conditions has been defined based on monitoring data in a real-time way.  
22                   Finally, it is suggested that the combination of these two critical values might be a  
23                   useful approach in a warning system for safeguarding of population in debris-flow  
24                   prone areas.

25  
26                   **Keywords:** debris flow, warning threshold, pore pressure, Wenjiagou gully  
27  
28

## 29 1. Introduction

30 A great number of debris-flows occurred in mountainous area every year in a rainy season. The  
31 fast population increase and high speed economic development in these areas always caused  
32 considerably catastrophic accidents and socio-economic losses. On Aug. 7 2010, a giant debris flow  
33 from Luojiayu gully and Sanyanyu gully at Zhouqu County, Gansu Province, China, killed 1765  
34 people living on the densely urbanized fan (Tang et al. 2011). Additionally in Southwestern China, the  
35 Wenchuan earthquake on May12, 2008, Yushu earthquake on April 14, 2010, Lushan earthquake on  
36 April 20, 2013, Ludian earthquake on August, 3 2014 and Nepal earthquake on April, 25 2015 trigged  
37 thousands of landslides and cracked mountains which are easy to develop into debris-flow under  
38 rainstorm condition. It's much similar to the Chi-Chi earthquake area (Taiwan), where numerous  
39 co-seismic landslides were triggered as well, and causing the continuous debris flows for 10 years  
40 after the earthquake (Yu et al. 2013b). These catastrophic events also indicated that the human  
41 vulnerability to natural hazards as well as the lack of knowledge on natural disaster prevention and  
42 mitigation. So that there is an urgent demand for an effective method to reduce the hazard and risk.  
43 Therefore, researchers have been working on forecasting debris-flow occurrences and setting up early  
44 warning systems. Especially on the regional scale, the methods for debris-flow early warning are  
45 frequently based on statistical models which have already been proved their importance in predicting  
46 debris-flow occurrence (Baum and Godt 2009; Guzzetti et al. 2007b; Keefer et al. 1987; Segoni et al.  
47 2014; Shuin et al. 2012; Tropeano and Turconi 2004). Several parameters were selected for the  
48 assessment of rainfall thresholds including rainfall intensity and duration (Cannon et al. 2008; Guzzetti  
49 et al. 2007a; Guzzetti et al. 2007b; Keefer et al. 1987), antecedent precipitation (Glade et al. 2000),  
50 and cumulative rainfall(Guo et al. 2013). Baum and Godt (2009) used a combination of a cumulative  
51 rainfall threshold, rainfall intensity-duration threshold and antecedent water index or soil wetness for  
52 shallow landslide forecasting.

53 Although widely used in the mountainous areas, these approaches are currently affected by some  
54 drawbacks which still restrain a fully operational application to early warning systems. One of the  
55 main problems is the lack of available data about rainfall with debris-flow occurrence or  
56 non-occurrence. Parameters selected for forecasting debris-flow occurrences are commonly limited to  
57 rainfall information, especially for one single gully. Chenyulan River Watershed in Taiwan, there are  
58 many debris flows triggered by Typhoon each time. After previous research identified 47 factors  
59 related to topography, geology, and hydrology, a normalized critical rainfall factor was suggested with  
60 an effective cumulative precipitation and a maximum hourly rainfall intensity (Yu et al. 2013a). The  
61 model produces a good assessment of the probability of occurrence of debris flows in the study area,  
62 and provides an approach in other regions to establish the local model.

63 Consequently, this paper presents a recent study on establishing the warning threshold for  
64 predicting debris-flow occurrence based on the rainfall records and a possible new indicator – pore  
65 pressure measured under the ground surface. The purposes of this paper are: (i) to propose a new  
66 method for establishing a warning threshold for forecasting debris-flow occurrence; (ii) to introduce  
67 the application and improvement of the alert threshold with a case study.

## 68 **2. Study area**

69 Wenjiagou gully located at the north of Qingping town, Mianzhu city, Sichuan province,  
70 Southwest China, has a catchment area of 7.8 km<sup>2</sup> and a 5.2 km long main channel, as shown in Fig. 1.  
71 The elevation of this study area ranges from 300 m to 1,600 m above sea level, and the valley with  
72 slope inclinations between 30° and 70° has been deeply incised by the Mianyuan river. The average  
73 yearly temperature of about 16 °C, and the climate is mild semi-tropical and moist with abundant  
74 rainfall and four distinguishable seasons. Eighty percent of the rainfall is concentrated in three months  
75 from July to September.

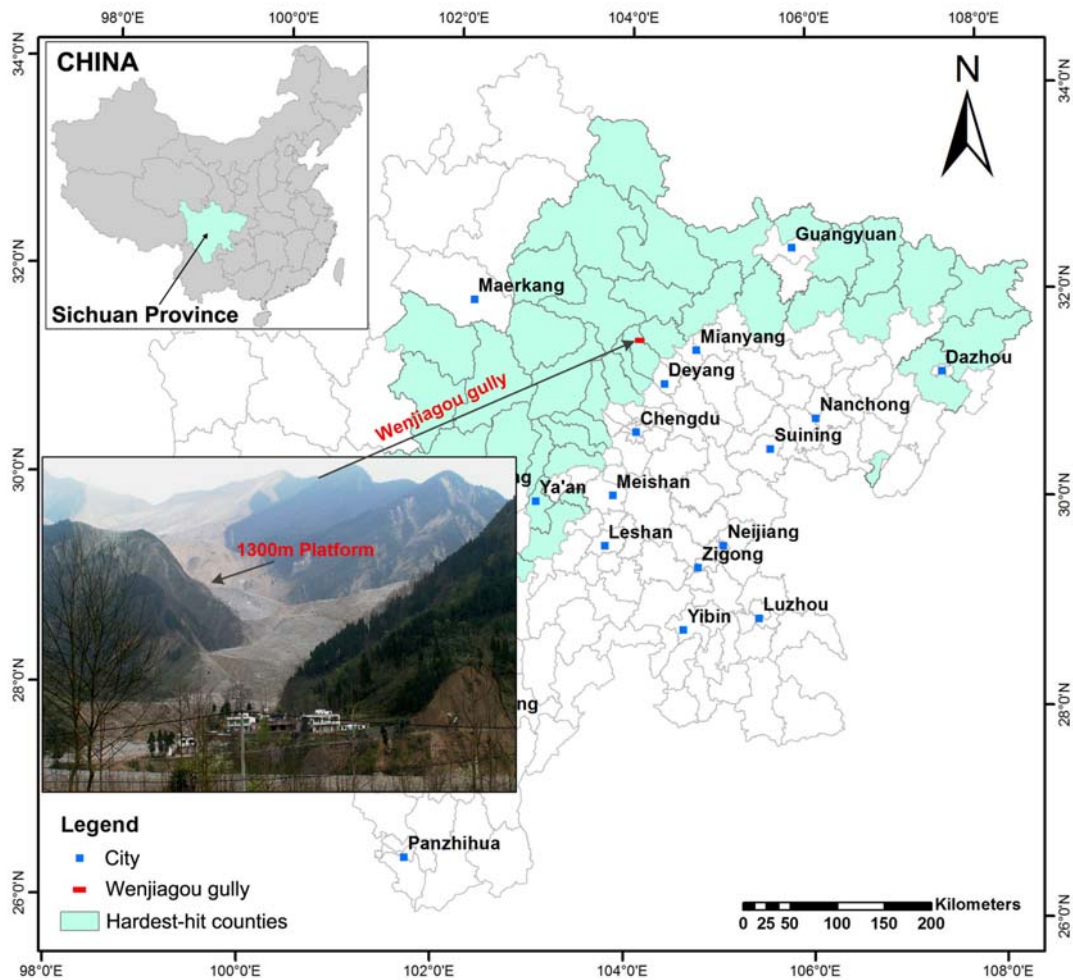

76

77 Fig. 1. Location of Wenjiagou gully modified from Huang et al. (2013). The inset photograph of Wenjiagou gully

78

at the left bottom was taken from the other side of Mianyuan River on August 10, 2008.

79

Before the Wenchuan earthquake on May 12, 2008, the Wenjiagou catchment was covered by rich  
 80 vegetation, and the channel was smooth and stable. At that time, few geological disasters occurred in  
 81 this region. Therefore, many farmers settled down at the foothills along the Mianyuan River.

82

After the earthquake, a giant landslide occurred upstream in the Wenjiagou catchment at the top of  
 83 the watershed, which generated abundant co-seismic rock fall material and finer landslide deposits on  
 84 a platform with an elevation of 1,300 m above sea level (Fig. 1, the photograph at left bottom of the  
 85 main map). These loose solid erodible materials could transform into debris-flows during rainy season  
 86 (Shieh et al. 2009). The catastrophic debris-flow triggered by a heavy rainfall on August 13, 2010,  
 87 with a peak discharge of 1,530 m<sup>3</sup>/s and a total volume of  $4.5 \times 10^6$  m<sup>3</sup>, caused many victims and the

88 burying of houses, and the most downstream dam in the catchment (Yu et al. 2012).

### 89 3. Methodology

90 According to Terzaghi theory in soil mechanics, the shear strength of material at a point within a  
91 slope can be expressed as Eq. (1).

$$92 \quad t = c + (\sigma - \mu) \tan \phi \quad (1)$$

93 where  $t$  is the shear strength of the slope material,  $c$  is the effective cohesion of the material,  
94  $\phi$  is the effective friction angle of the material,  $\sigma$  is the total stress normal to a potential slip  
95 surface, and  $\mu$  is the pore-water pressure. Generally, the strength parameters ( $c, \phi$ ) of the slope  
96 material mainly determined the stability of the slope and the potential position of the slip surface, also  
97 including the parameter ( $\sigma$ ) determined by the height and inclination of the slope and the density of  
98 the slope material, and the distribution of pore-water pressure ( $\mu$ ) within the slope.

99 Rainfall infiltrates into a hillslope, always accumulating in a saturated zone above a permeability  
100 barrier, and increases the pore-water pressures within the slope material. Based on the Terzaghi's work,  
101 the increase in  $\mu$  would cause the effective overburden stress ( $\sigma - \mu$ ), and therefore combining  
102 with the decrease of the shear strength until the slope fails. Presumed by Keefer et al. (1987), there  
103 exists a critical level of the pore-water pressure ( $\mu_c$ ) for any given slope, facilitating the potential slip  
104 surface to develop, and causing the slope become unstable. In order to propose a formula to calculate  
105 the critical level of the pore-water pressure, a highly idealized model of an infinite slope composed of  
106 cohesionless materials ( $c = 0$ ) has been presented in Keefer et al. (1987), where both slip surface  
107 and piezometric surface are parallel to the ground surface. For all these assumptions, the critical  
108 pore-water pressure can be calculated by Eq. (2).

$$109 \quad \mu_c = Z \times \gamma_t \times \left( 1 - \frac{\tan \theta}{\tan \phi} \right) \quad (2)$$

110 where  $Z$  is the depth of slip surface,  $\gamma_t$  is the total unit weight of the slope material, and  $\theta$  is

111 the slope inclination, the other parameters are the same to those mentioned-above.

112 In this respect, the Wenjiagou gully was selected as the case study area, and the pore-water  
113 pressure and rainfall monitoring sensors were installed in-situ to capture the real-time data for  
114 verifying these formulas and put forward a warning threshold for forecasting debris-flow occurrence  
115 finally. For this purpose, the history events about rainfall with debris-flow occurrences and  
116 non-occurrences have been collected during the initial research, unfortunately, none of those data has  
117 any pore-water pressure information. Even though several years have already passed under the  
118 real-time monitoring system, there are still limited available data for this research (Huang et al.  
119 2015a).

### 120 **3.1 Data analysis**

121 Several methods were provided to collect available data, including debris-flow inventory maps,  
122 technical reports and documents presented by government agency. Since there is a large difference in  
123 debris flow frequency before and after the Wenchuan earthquake, only the data after quake were used  
124 for the analyses (Table 1).

125 Table 1 shows that the number of debris-flows decreases with time. Two years after the earthquake,  
126 however, several giant debris-flows still caused catastrophic losses, which alarmed the public and  
127 government because of its huge destructive power and long-term impact. Particularly on Aug. 13,  
128 2010, a great rainstorm lasting for 2 hours during midnight, triggered a giant debris flow, which buried  
129 the Qingping town in the Mianyuan River floodplain. According to the inventory report, the maximum  
130 deposition height was until 6 m. Most of the check dams located in the downstream part of the  
131 Wenjiagou gully collapsed and lost their effectiveness after passing of the debris-flow. It eroded the  
132 channel bottom over a depth of about 13 m (Yu et al. 2012).

133

134

135 Table 1. Primary rainfall events in Wenjiagou gully (2008-2011), from Xu (2010) & Yu et al. (2012)

| Time                 | Maximum hourly rainfall intensity (I <sub>h</sub> : mm/h) | Accumulated precipitation (R <sub>dt</sub> : mm) | Debris-flow occurrence or not | Volume of debris flow (m <sup>3</sup> ) |
|----------------------|-----------------------------------------------------------|--------------------------------------------------|-------------------------------|-----------------------------------------|
| Sep. 24, 2008        | 30.5                                                      | 88.0                                             | Yes                           | 5.0×10 <sup>5</sup>                     |
| Jul. 18, 2009        | 20.5                                                      | 70.5                                             | No                            | -                                       |
| Aug. 25, 2009        | 28.9                                                      | 86.7                                             | No                            | -                                       |
| Sep. 13, 2009        | 15.4                                                      | 84.6                                             | No                            | -                                       |
| May 27, 2010         | 10.5                                                      | 34.9                                             | No                            | -                                       |
| Jun. 13, 2010        | 5.5                                                       | 95.1                                             | No                            | -                                       |
| Jul. 25, 2010        | 11.6                                                      | 89.6                                             | No                            | -                                       |
| Jul. 31, 2010        | 51.7                                                      | 60.2                                             | Yes                           | 1.0~2.0×10 <sup>5</sup>                 |
| <b>Aug. 13, 2010</b> | <b>70.6</b>                                               | <b>227.0</b>                                     | <b>Yes</b>                    | <b>4.5×10<sup>6</sup></b>               |
| Aug. 19, 2010        | 31.9                                                      | 72.6                                             | Yes                           | 3.0×10 <sup>5</sup>                     |
| Sep. 18, 2010        | 29.0                                                      | 52.0                                             | Yes                           | 1.7×10 <sup>5</sup>                     |
| Sep. 22, 2010        | 24.5                                                      | 81.2                                             | No                            | -                                       |
| May 2, 2011          | 5.6                                                       | 35.8                                             | No                            | -                                       |
| Jul. 5, 2011         | 12.5                                                      | 61.3                                             | No                            | -                                       |
| Jul. 21, 2011        | 23.5                                                      | 63.2                                             | No                            | -                                       |
| Jul. 30, 2011        | 18.2                                                      | 78.3                                             | No                            | -                                       |
| Aug. 16, 2011        | 10.5                                                      | 44.3                                             | No                            | -                                       |
| Aug. 21, 2011        | 13.6                                                      | 76.6                                             | No                            | -                                       |
| Sep. 7, 2011         | 15.2                                                      | 51.3                                             | No                            | -                                       |
| Oct. 27, 2011        | 8.5                                                       | 36.9                                             | No                            | -                                       |

136

137 Therefore, pore-water pressure and rainfall monitoring sensors have been installed for the  
 138 relationship analyzes between rainfall, pore-water pressure and debris-flow occurrence. The real-time  
 139 monitoring system in the Wenjiagou gully includes 7 automatic rain gauges and 5 pore-water pressure  
 140 monitoring instruments, which have been completely finished until April 1, 2012, as shown in Table 2  
 141 and Figure 2. It can be seen that all rain gauges are arranged at the upstream of each branch gully in  
 142 the Wenjiagou gully, and pore pressure sensors are located along the mainstream of the Wenjiagou  
 143 gully in the deposits.

144 In 2012, a heavy rainfall event on August 14 triggered a debris-flow, which has been caught totally  
 145 by the real-time monitoring system. During the rainstorm, monitoring sensors YL05, YL06 and SY02,  
 146 SY05 lost the connection with the monitoring center. The other monitoring sensors worked well, as

147 shown in Figure 2, Figure 3 and Figure 4.

148 Table 2. List of monitoring devices in Wenjiagou gully

| No.  | Longitude  | Latitude   | Elevation(m) | Purposes                                                                                                                                                                          |
|------|------------|------------|--------------|-----------------------------------------------------------------------------------------------------------------------------------------------------------------------------------|
| YL01 | E104°8'21" | N31°33'32" | 1652         | To gain the rainfall in the study area, and analyze the relationship between rainfall and debris-flow occurrence.                                                                 |
| YL02 | E104°7'55" | N31°33'11" | 1390         |                                                                                                                                                                                   |
| YL03 | E104°8'39" | N31°33'14" | 1671         |                                                                                                                                                                                   |
| YL04 | E104°8'16" | N31°32'47" | 1490         |                                                                                                                                                                                   |
| YL05 | E104°7'47" | N31°32'39" | 1433         |                                                                                                                                                                                   |
| YL06 | E104°7'46" | N31°33'29" | 1166         |                                                                                                                                                                                   |
| YL07 | E104°7'9"  | N31°32'59" | 1025         |                                                                                                                                                                                   |
| SY01 | E104°8'12" | N31°33'9"  | 1210         | To gain the pore-water pressure, and analyze the relationship between pore-water pressure and debris-flow occurrence. All of them were buried at a depth of 1 m under the ground. |
| SY02 | E104°8'11" | N31°33'9"  | 1212         |                                                                                                                                                                                   |
| SY03 | E104°8'11" | N31°33'8"  | 1208         |                                                                                                                                                                                   |
| SY04 | E104°7'49" | N31°32'55" | 1092         |                                                                                                                                                                                   |
| SY05 | E104°7'48" | N31°32'56" | 1081         |                                                                                                                                                                                   |

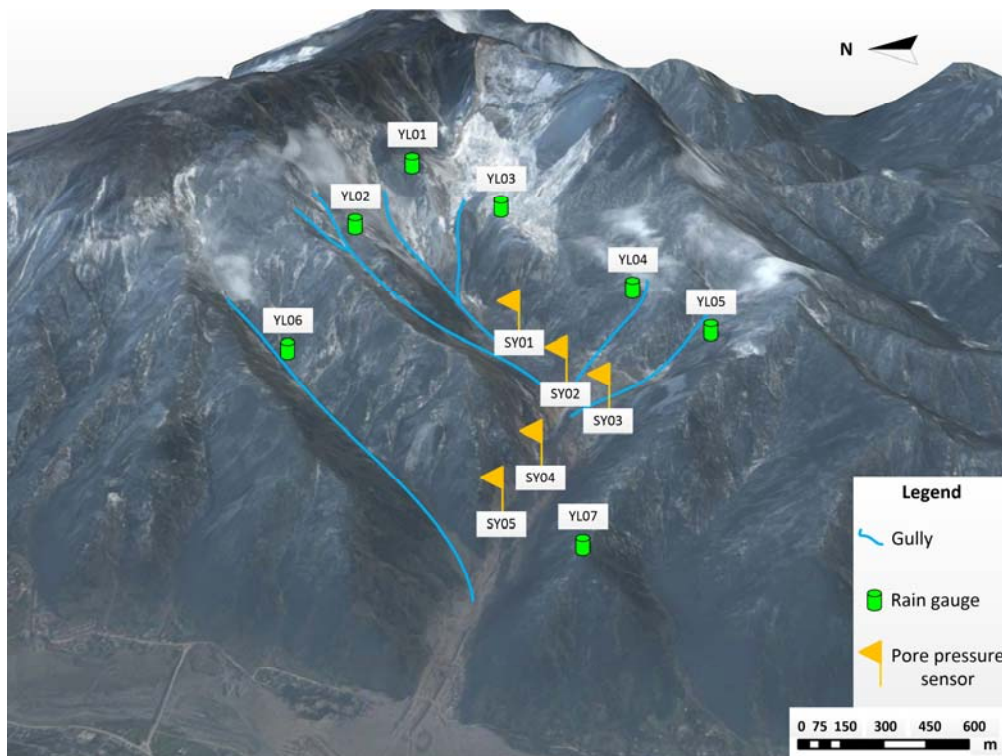

149  
150 Fig. 2. Layout map of the monitoring devices installed in Wenjiagou gully ( The base map is from Google Earth,  
151 the date of background image is Dec. 18, 2010).

152 Figure 3 and Figure 4, show that the rainfall was almost concentrated in two hours from 17:00  
153 until 19:00. The amount of precipitation was highly variable along the channel of the Wengjiagou  
154 gully. The maximum hourly rainfall intensity is 73.5 mm (YL01), and the standard deviation is 12.76.  
155 The cumulative maximum rainfall is 118 mm (YL04), and the standard deviation is 14.75.



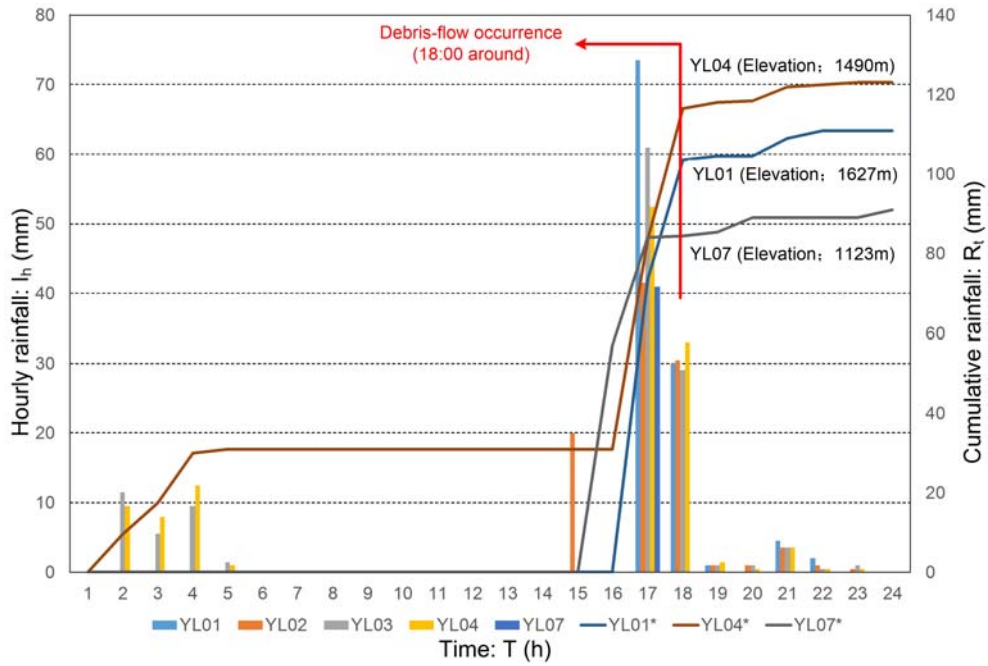

156  
157  
158

Fig. 3. The rainfall in Wenjiagou gully on Aug. 14, 2012 (the column maps are hourly rainfall and the single line maps are cumulative rainfall)

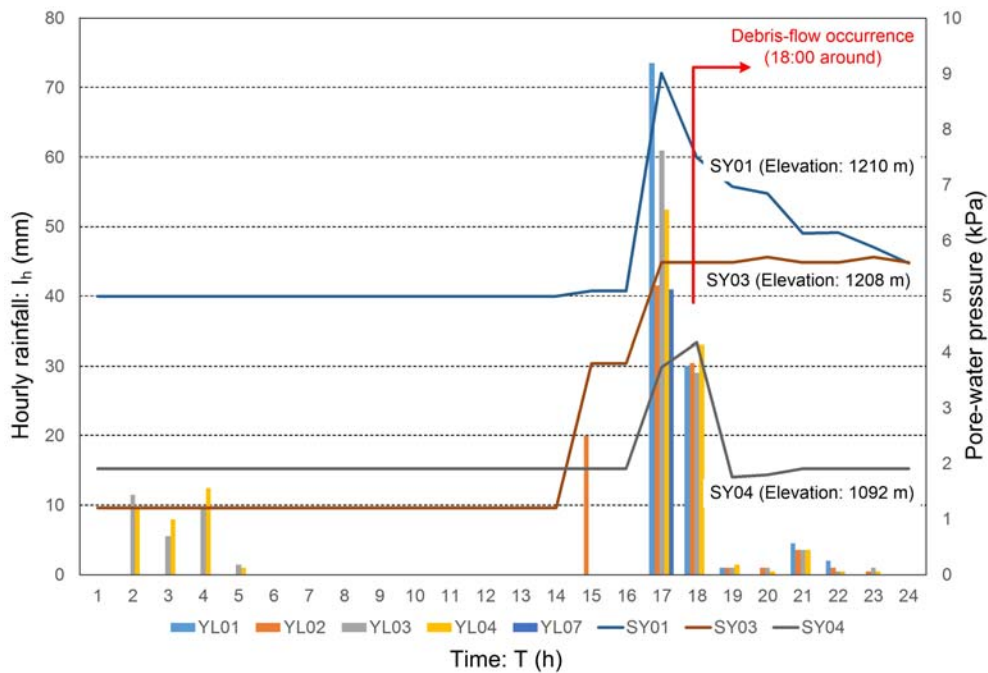

159  
160  
161

Fig. 4. The rainfall and pore-water pressure in Wenjiagou gully on Aug. 14, 2012 (the column maps are hourly rainfall and the single line maps are pore-water pressure)

162 The maximum hourly rainfall and cumulative rainfall are not found in the highest part of the  
163 catchment. The variety in cumulative maximum rainfall is larger than the variety in maximum hourly  
164 rainfall intensity. The Figure 4 shows the relation between hourly rainfall and pore-water pressure: the  
165 small amount of rain from 2:00 to 5:00 with a maximum hourly rainfall of 12.5 mm did not trigger any

166 change in pore-water pressure. However, during the concentrated rain period between 17:00 and 19:00  
167 there was a sudden rise of the pore-water pressure. The debris flow was triggered adjacently when it  
168 reached the maximum rise of the pore-water pressure. The highest value of the pore-water pressure are  
169 9.01 kPa (SY01) at 17:00, 5.7 kPa (SY03) at 20:00 and 4.17 kPa (SY04) at 18:00. The sudden rise of  
170 pore-water pressure may be a good indicator for the triggering of debris-flows.

### 171 **3.2 Warning threshold for Wenjiagou gully**

172 In order to improve the warning thresholds for forecasting the debris flow occurrence, which not  
173 just represent a simple relationship between rainfall and debris-flow occurrence, the pore-water  
174 pressure of landslide deposits was incorporated into the threshold for it is an important geotechnical  
175 parameter in the physical models of debris-flow generation. Back to the critical pore-water pressure  
176 Eq.(2) above-mentioned, combing with the results from field investigation in the Wenjiagou gully on  
177 Oct. 8, 2010, the total unit weight of landslide deposits in the Wenjiagou gully is 21.05 kN/m<sup>3</sup>, the  
178 slope inclination of 18.5°, and the effective friction angle of the deposited material is 27.5°. Thus, the  
179 critical pore-water pressure of the deposited material can be calculated by Eq. (3).

$$180 \quad \mu_c = 7.52 \times Z \quad (3)$$

181 It's a linear function, which can be shown in a graph (Figure 5). If the slip surface of the deposited  
182 material is at the position of 1 m depth under the ground, the critical pore-water pressure should be  
183 7.52 kPa. With a redundant consideration of 25% in depth of slip surface, the critical pore pressure is  
184 between 5.64 kPa and 9.40 kPa (Figure 5). However, up to present in the real-time monitoring system,  
185 only 3 events of debris-flow occurrences were captured (August 14, 2012; August 17, 2012 and July 9,  
186 2013). When the debris flow occurred, the pore-water pressure and cumulative rainfall information are  
187 demonstrated with line graph and column graph respectively (Figure 6). The average of monitoring  
188 critical pore-water pressure decrease with time, comparing to the rise of cumulative rainfall. It  
189 indicates that the critical pore-water pressure for debris-flow occurrence can be revised and adjusted

190 by itself. Meanwhile, the theoretic critical pore-water pressure ( $\mu_c = 7.52 \text{ kPa}$ ) can be used to  
 191 predict the debris-flow occurrence, by considering a probability of 25% in the depth of slip surface.  
 192 Therefore, the thresholds of critical pore-water pressure from 5.64 kPa to 9.40 kPa can be used to  
 193 supplement the warning threshold for debris-flow prediction in the Wenjiagou gully.

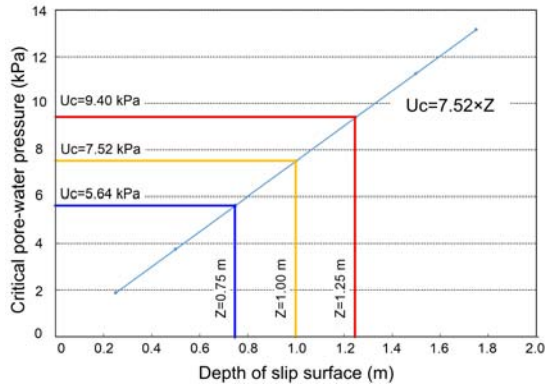

Fig. 5. The theoretic critical pore-water pressure of deposited material in the Wenjiagou gully

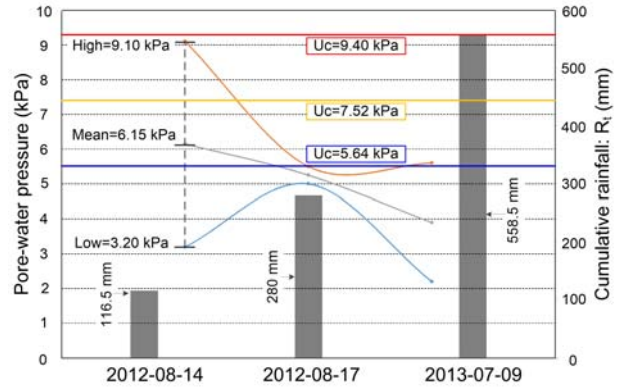

Fig. 6. The monitoring critical pore-water pressure of deposited material in the Wenjiagou gully

194 Considering the acquired available data, based on the methodology above methioned, the  
 195 maximum hourly rainfall ( $I_h$ : mm) and cumulative rainfall ( $R_t$ : mm) are selected as the basic triggering  
 196 rainfall parameters for the warning threshold, and the theoretical critical pore-water pressure ( $U_c$ ) has  
 197 been defined as an assistant factor in forecasting debris-flow occurrence. For each rainfall event with  
 198 or without debris-flow occurrence,  $R_t$  and  $I_h$ , can be plotted in a X-Y field, like the debris-flow event  
 199 on Aug. 13, 2010 (Fig. 7 Tag A). The rainfall threshold for predicting debris-flow occurrence can be  
 200 defined and calculated by Eq. (4) and Figure 7 (Tag C). The line separates these debris-flow  
 201 occurrences from non-occurrences, and indicating that when rainfall starting the point (cumulative  
 202 rainfall & hourly rainfall intensity) can be calculated in a real-time and plotted into the diagram. While  
 203 the point crosses the line, which shows the probability of debris-flow occurrence is much higher. More  
 204 detail information can be found in Zhuang et al. (2014) and Huang et al. (2015b).

$$205 \quad R_t + 2.4I_h = 120 \quad (4)$$

206 where  $R_t$  is the cumulative rainfall (mm),  $I_h$  is the maximum hourly rainfall (mm).

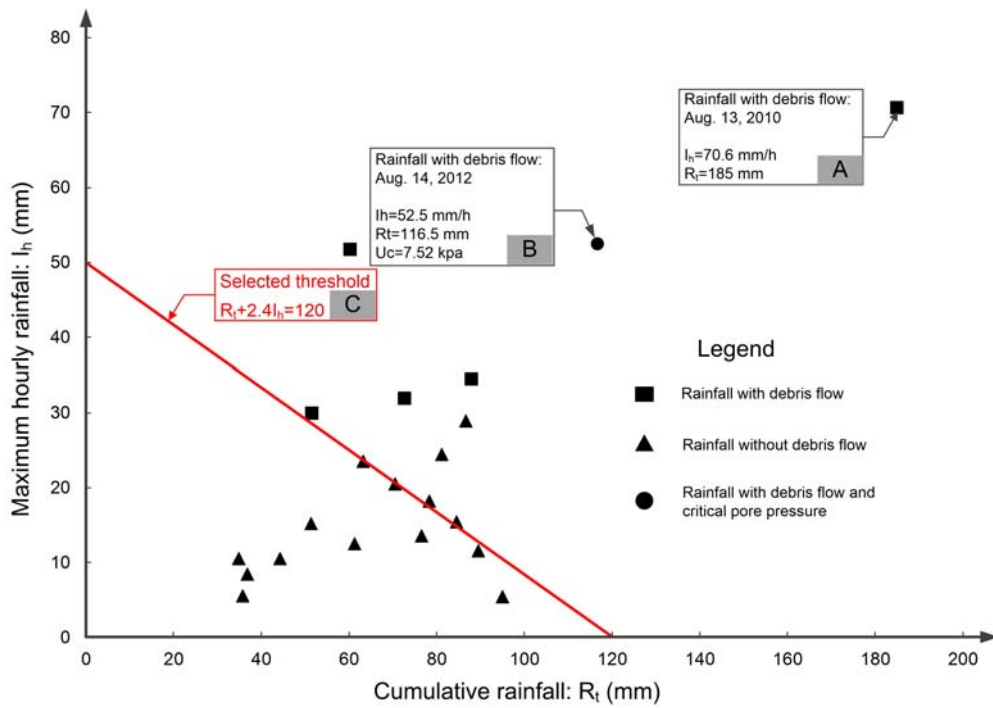

Fig. 7. Rainfall threshold based on maximum hourly rainfall and cumulative rainfall

207  
208

209 Figure 7 shows thirteen points (86.7%) of collected rainfall events (Table 1) with no debris flows  
 210 lying below the threshold line, and two error points above this line. However, as mentioned above,  
 211 only the rainfall threshold may not be enough to predict debris-flow occurrence. Pore-water pressure,  
 212 therefore, has been selected to refine the warning threshold. Figure 5 and Figure 6 show that the  
 213 critical pore-water pressure ( $U_c$ ) above a certain threshold is also a valuable indicator for forecasting  
 214 debris-flow occurrence. Based on the verification of theoretical and real-time monitoring pore-water  
 215 pressure, the threshold for pore-water pressure ( $U$ ) to predict the probability of debris flow occurrence,  
 216 can be defined by Eq. (5) based on the Eq. (2) and Eq. (3).

217

$$U \geq U_c \quad (5)$$

218

219

220

When both of the two thresholds are satisfied (Eq.4 & Eq.5), there must be a very high possibility  
 of debris-flow occurrence. Generally, more available data will improve the warning thresholds, and  
 make them more reliable and accurate for debris-flow prediction.

221

#### 4. Example of application

222

In order to make a better use for the debris-flow early warning, some criteria have to be simplified

223 for the preliminary stage. Therefore, a three-level early warning system has been proposed for the  
 224 Wenjiagou gully, as shown in Table 3.

225 Table 3. Recommended warning levels for Wenjiagou gully

| Warning level | Trigger                                                                        | Response                                                                                                                          |
|---------------|--------------------------------------------------------------------------------|-----------------------------------------------------------------------------------------------------------------------------------|
| I             | Default level.<br>Eq. (4) is not satisfied or $U \leq 5.64$ kPa.               | <b>Null:</b> but data are checked daily. Weekly monitoring bulletin.                                                              |
| II            | Attention level.<br>Eq. (4) is satisfied or $5.64 \text{ kPa} < U < 9.40$ kPa. | <b>Watch:</b> data are checked more frequently. Daily monitoring bulletin. Authority and expert are alerted. Preparing for alarm. |
| III           | Alert level.<br>Eq. (4) is satisfied or $U \geq 9.40$ kPa.                     | <b>Warning:</b> data are checked even more frequently. Two monitoring bulletins per day. Local people are alerted.                |

226 At level one (Blue) there is no risk of debris-flows. At level two (Orange) there is a chance of  
 227 debris-flow occurrence in the near future, and warning messages need to be sent to local authority and  
 228 countermeasures need to be discussed. Level three (Red) there is very likely to occur right now,  
 229 therefore, local residents need to be alerted and forbidden going to that place.

230 In order to show how this presented method can be used in debris-flow early warning, a heavy  
 231 rainfall event on Jun. 19, 2013 (YL01 & SY01) has been selected as a case application (Figure 8). The  
 232 red circle solid points give the real-time monitoring rainfall information of the event, with cumulative  
 233 rainfall on the X axis and hourly rainfall intensity on Y axis. The Tag A in Figure 8 shows the  
 234 monitored rainfall at 7:00 am on Jun. 19, 2013, and the U-value of the pore-water pressure is 7.00 kPa  
 235 at that time. One hour later at 8:00 am (Tag B), the real-time rainfall has exceeded the rainfall  
 236 threshold, but the maximum measured U-value didn't met the critical value given in Eq. (5) ( $5.64 \text{ kPa}$   
 237  $< U=7.60 \text{ kPa} < 9.40 \text{ kPa}$ ) which indicated the warning level stayed in Orange. Finally, the rainfall  
 238 went down after 8:00 am, and no debris-flow occurred during this rain event.

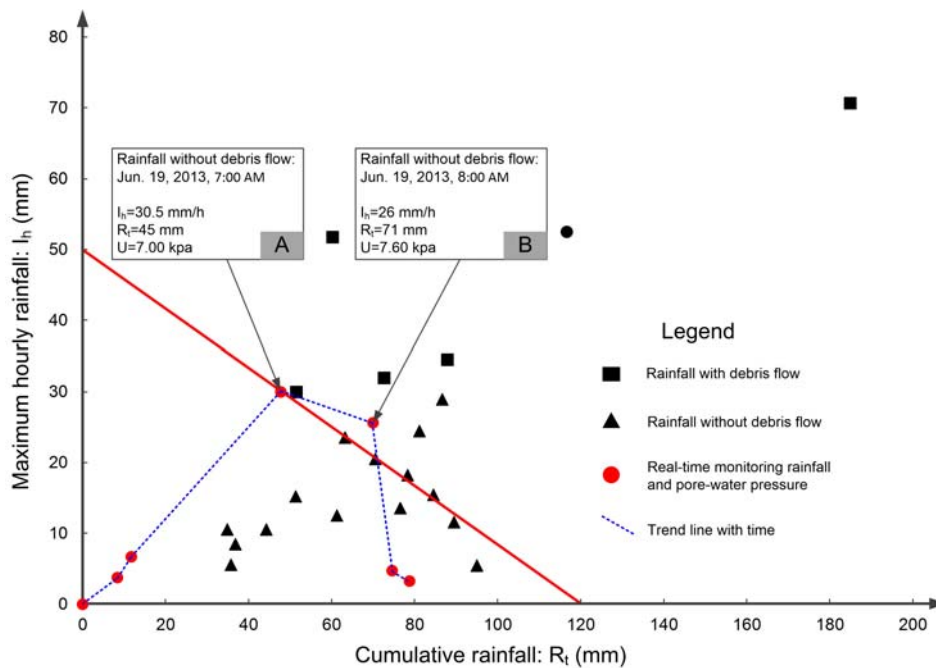

Fig. 8. Case application of the presented method in Wenjiagou gully (Jun. 19, 2013)

239

240

241 This case study shows, that it is worthwhile to continue to test the presented warning threshold as a  
 242 useful tool for debris-flow prevention and mitigation in mountainous area at a preliminary stage. The  
 243 alert threshold can be improved and modified as long as more data are available during subsequent  
 244 studies in the future.

## 245 5. Discussion and conclusion

246 Debris-flow, usually triggered by rainstorm every year in the mountainous region in Southwest  
 247 China, always cause significant harm both in human and property losses. Therefore, in order to  
 248 prevent such natural disaster there is an urgent requirement for effective methods to predict  
 249 debris-flow occurrence. The warning thresholds are provided and discussed in this paper, which not  
 250 only use the common rainfall threshold, but also include the critical pore-water pressure from  
 251 theoretical analysis of slope stability.

252 Two triggering factors: maximum hourly rainfall versus cumulative rainfall, and pore-water  
 253 pressure, have been selected to establish the warning thresholds for debris-flow occurrence prediction.  
 254 The Wenjiagou gully was selected as a case study for a detailed explanation of the provided method,

255 and the results show that it is worth the effort to test further this approach for the early warning of  
256 debris-flows, especially at the preliminary stage. However, the assessment of such a warning threshold  
257 cannot be extended, to larger areas. Moreover the collection of pore-water pressure data in a  
258 distributed way is a rather cumbersome and costly undertaking and will be restricted to dangerous  
259 catchments like the Wenjiagou gully. Another the complicated problem is the final determination  
260 whether to alert local population, and whether compulsory actions need to be done at once, or a period  
261 of time later. Debris-flow early warning is not an imminent hazard but is just regarded as a potential  
262 danger. In spite of these limitations, the method has reached the goal to establish a warning threshold  
263 for debris-flow early warning, and more subsequent work will be carried on in the future.

#### 264 **Acknowledgements**

265 This study was financially supported by the National Natural Science Foundation of China (Grant  
266 No. 41521002 and No. 41302242), Specialized Research Fund for the Doctoral Program of Higher  
267 Education of China (Grant No. 20135122130002), and State Key Laboratory of Geo-hazard  
268 Prevention and Geo-environment Protection (Chengdu University of Technology) (Grant No.  
269 SKLGP2013Z007). The authors also give great thanks to Prof. Theo van Asch for his review of an  
270 earlier version of this paper and for his suggestions to polish the language, which greatly improved the  
271 quality of the manuscript.

#### 272 **References**

- 273 Baum RL, Godt JW (2009) Early warning of rainfall-induced shallow landslides and debris flows in the USA  
274 Landslides 7:259-272 doi:10.1007/s10346-009-0177-0
- 275 Cannon SH, Gartner JE, Wilson RC, Bowers JC, Laber JL (2008) Storm rainfall conditions for floods and debris  
276 flows from recently burned areas in southwestern Colorado and southern California Geomorphology  
277 96:250-269 doi:10.1016/j.geomorph.2007.03.019
- 278 Glade T, Crozier M, Smith P (2000) Applying probability determination to refine landslide-triggering rainfall  
279 thresholds using an empirical “Antecedent Daily Rainfall Model” Pure and Applied Geophysics  
280 157:1059-1079
- 281 Guo X-j, Cui P, Li Y (2013) Debris flow warning threshold based on antecedent rainfall: A case study in Jiangjia  
282 Ravine, Yunnan, China Journal of Mountain Science 10:305-314 doi:10.1007/s11629-013-2521-z
- 283 Guzzetti F, Peruccacci S, Rossi M, Stark CP (2007a) The rainfall intensity–duration control of shallow landslides  
284 and debris flows: an update Landslides 5:3-17 doi:10.1007/s10346-007-0112-1

285 Guzzetti F, Peruccacci S, Rossi M, Stark CP (2007b) Rainfall thresholds for the initiation of landslides in central  
286 and southern Europe *Meteorology and Atmospheric Physics* 98:239-267  
287 doi:10.1007/s00703-007-0262-7

288 Huang J, Huang R, Ju N, Xu Q, He C (2015a) 3D WebGIS-based platform for debris flow early warning: A case  
289 study *Engineering Geology* 197:57-66 doi:10.1016/j.enggeo.2015.08.013

290 Huang J, Ju NP, Liao YJ, Liu DD (2015b) Determination of rainfall thresholds for shallow landslides by a  
291 probabilistic and empirical method *Natural Hazards and Earth System Sciences* 15:2715-2723  
292 doi:10.5194/nhess-15-2715-2015

293 Huang R, Huang J, Ju N, He C, Li W (2013) WebGIS-based information management system for landslides  
294 triggered by Wenchuan earthquake *Natural hazards* 65:1507-1517

295 Keefer DK et al. (1987) Real-Time Landslide Warning during Heavy Rainfall *Science* 238:921-925

296 Segoni S, Rosi A, Rossi G, Catani F, Casagli N (2014) Analysing the relationship between rainfalls and  
297 landslides to define a mosaic of triggering thresholds for regional-scale warning systems *Natural*  
298 *Hazards and Earth System Science* 14:2637-2648 doi:10.5194/nhess-14-2637-2014

299 Shieh C-L, Chen Y, Tsai Y, Wu J (2009) Variability in rainfall threshold for debris flow after the Chi-Chi  
300 earthquake in central Taiwan, China *International Journal of Sediment Research* 24:177-188

301 Shuin Y, Hotta N, Suzuki M, Ogawa K-i (2012) Estimating the effects of heavy rainfall conditions on shallow  
302 landslides using a distributed landslide conceptual model *Physics and Chemistry of the Earth, Parts*  
303 *A/B/C* 49:44-51 doi:10.1016/j.pce.2011.06.002

304 Tang C, Rengers N, van Asch TWJ, Yang YH, Wang GF (2011) Triggering conditions and depositional  
305 characteristics of a disastrous debris flow event in Zhouqu city, Gansu Province, northwestern China  
306 *Natural Hazards and Earth System Science* 11:2903-2912 doi:10.5194/nhess-11-2903-2011

307 Tropeano D, Turconi L (2004) Using historical documents for landslide, debris flow and stream flood prevention.  
308 Applications in Northern Italy *Natural Hazards* 31:663-679

309 Xu Q (2010) The 13 August 2010 catastrophic debris flows in Sichuan Province: characteristics,  
310 genetic mechanism and suggestions. *Journal of Engineering Geology* 18:596-608

311 Yu B, Li L, Wu Y, Chu S (2013a) A formation model for debris flows in the Chenyulan River Watershed, Taiwan  
312 *Natural Hazards* 68:745-762 doi:10.1007/s11069-013-0646-6

313 Yu B, Ma Y, Wu Y (2012) Case study of a giant debris flow in the Wenjia Gully, Sichuan Province, China  
314 *Natural Hazards* 65:835-849 doi:10.1007/s11069-012-0395-y

315 Yu B, Ma Y, Wu Y (2013b) Case study of a giant debris flow in the Wenjia Gully, Sichuan Province, China  
316 *Natural Hazards* 65:835-849 doi:10.1007/s11069-012-0395-y

317 Zhuang J-q, Iqbal J, Peng J-b, Liu T-m (2014) Probability prediction model for landslide occurrences in Xi'an,  
318 Shaanxi Province, China *Journal of Mountain Science* 11:345-359
